# Supplementary material
Source: Copernicus journal article supplement (doi:10.5194/egusphere-2026-2808)
Supplement: Supplementary file 1 [file egusphere-2026-2808-supplement.pdf]

# Supplementary material

Luigi Cafiero<sup>1</sup>, Miriam Bertola<sup>2</sup>, Peter Valent<sup>2</sup>, Francesco Laio<sup>1</sup>, Günter Blöschl<sup>2,3</sup>, and Alberto Viglione<sup>1</sup>

<sup>1</sup>Department of Environment, Land and Infrastructure Engineering, Politecnico di Torino, Corso Duca degli Abruzzi, 24, Turin, 10129, Italy

<sup>2</sup>Institute of Hydraulic Engineering and Water Resources Management, Vienna University of Technology, Karlsplatz 13/222, Vienna, 1040, Austria

<sup>3</sup>Department of Civil, Chemical, Environmental, and Materials Engineering, Università di Bologna, Viale del Risorgimento, 2, Bologna, 40136, Italy

**Correspondence:** Luigi Cafiero (luigi.cafiero@polito.it)

## Overview

This document provides supplementary figures for each of the 10 Austrian hydrological hotspots analyzed in the main paper. Hotspots are groups of hydrologically similar catchments sharing dominant flood-generation mechanisms; their spatial distribution is shown in Figure 1 of the main text. For each hotspot, three figures are presented:

- 5     – **Figure (a):** Process-level probability density functions of the main hydrometeorological variables represented in the model and their variation under climate change, shown for each season (rows: DJF, MAM, JJA, SON).
- **Figure (b):** Projected variation of the Flood Frequency Curve (FFC), shown for each season (rows: DJF, MAM, JJA, SON).
- **Figure (c):** Projected variation of the 2-year and 100-year flood quantiles with 80% confidence intervals, distinguishing  
10    the contribution of distinct flood-generating mechanisms: the upward shift of the 0°C isotherm (*0° line*), changes in precipitation intensity and duration (*precipitation*), and variations in soil moisture (*antecedent conditions*). The *combined* scenario integrates the concurrent effects of all three mechanisms.

## 1 Hotspot – [Flysch]

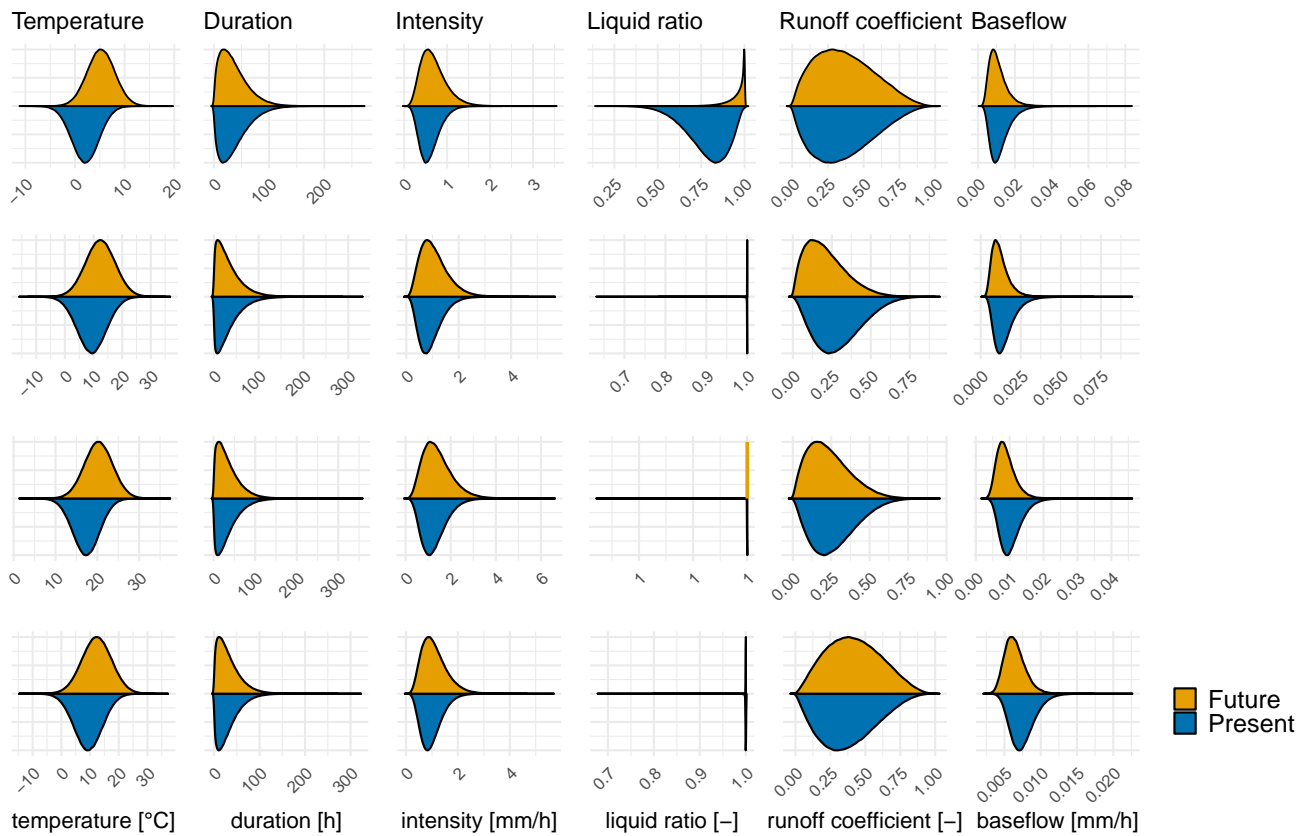

**Figure 1.** Probability density functions of the main hydrometeorological processes and their variation under climate change, shown for each season (rows: DJF, MAM, JJA, SON). Present period in blue, future period in orange.

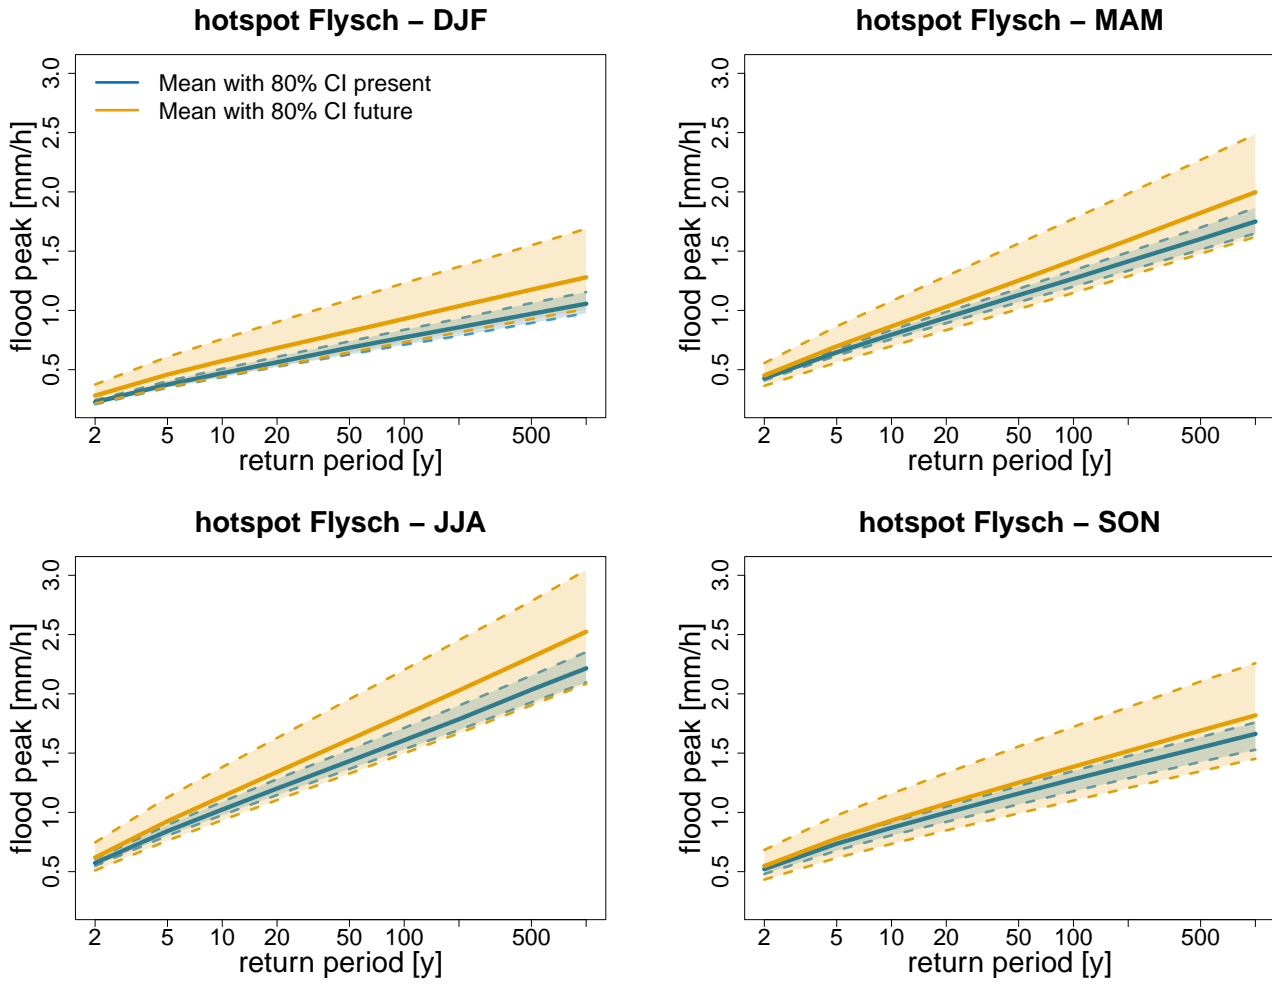

**Figure 2.** Seasonal flood frequency curves for the present (blue) and future (orange) periods with 80% confidence intervals.

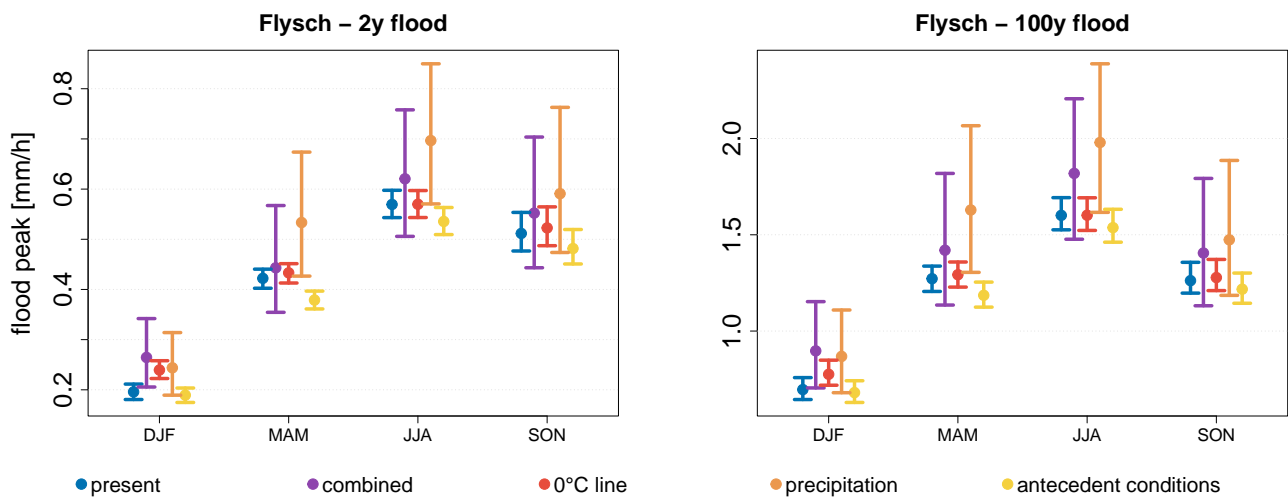

**Figure 3.** Projected variation of the 2-year (left) and 100-year (right) flood quantile with 80% confidence intervals. Scenarios isolate the contribution of distinct flood-generating mechanisms.

## 2 Hotspot – [Hoalp]

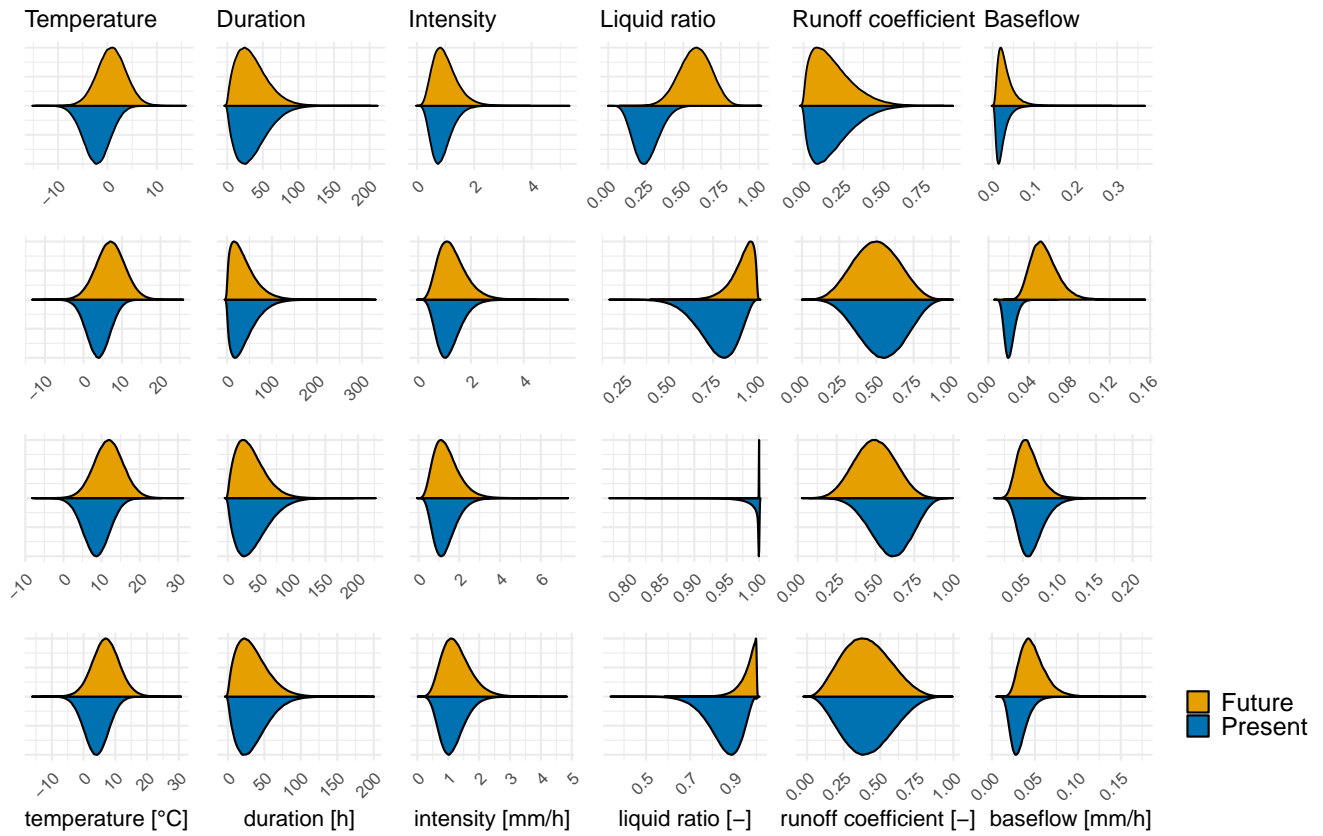

**Figure 4.** Probability density functions of the main hydrometeorological processes and their variation under climate change, shown for each season (rows: DJF, MAM, JJA, SON). Present period in blue, future period in orange.

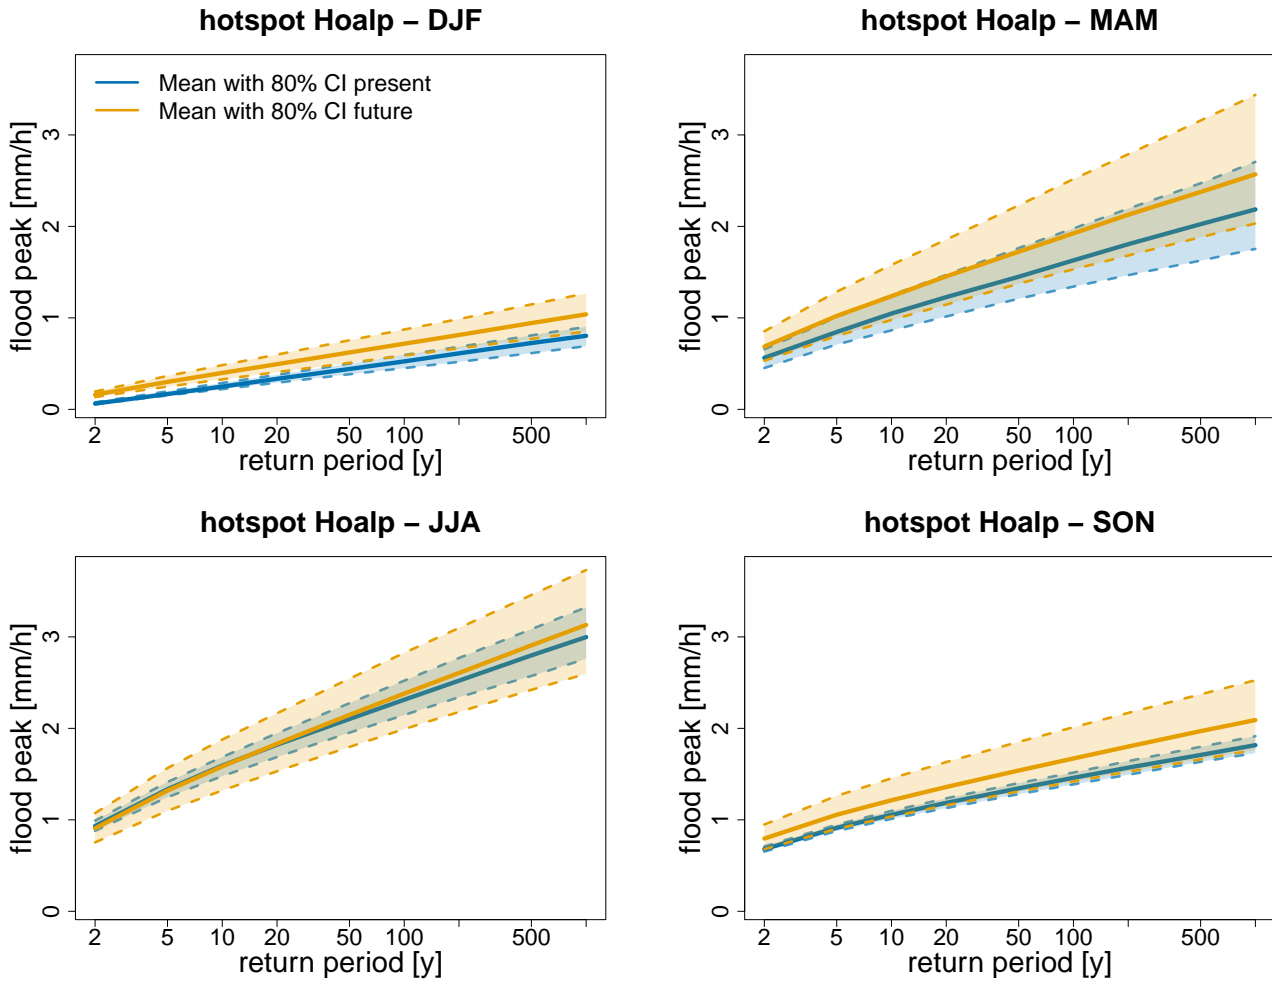

**Figure 5.** Seasonal flood frequency curves for the present (blue) and future (orange) periods with 80% confidence intervals.

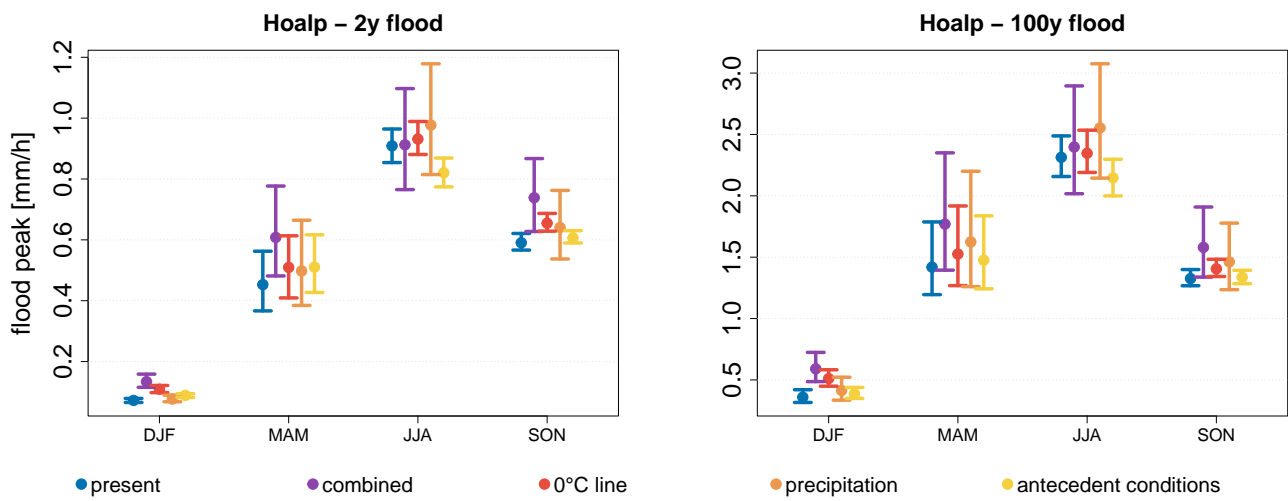

**Figure 6.** Projected variation of the 2-year (left) and 100-year (right) flood quantile with 80% confidence intervals. Scenarios isolate the contribution of distinct flood-generating mechanisms.

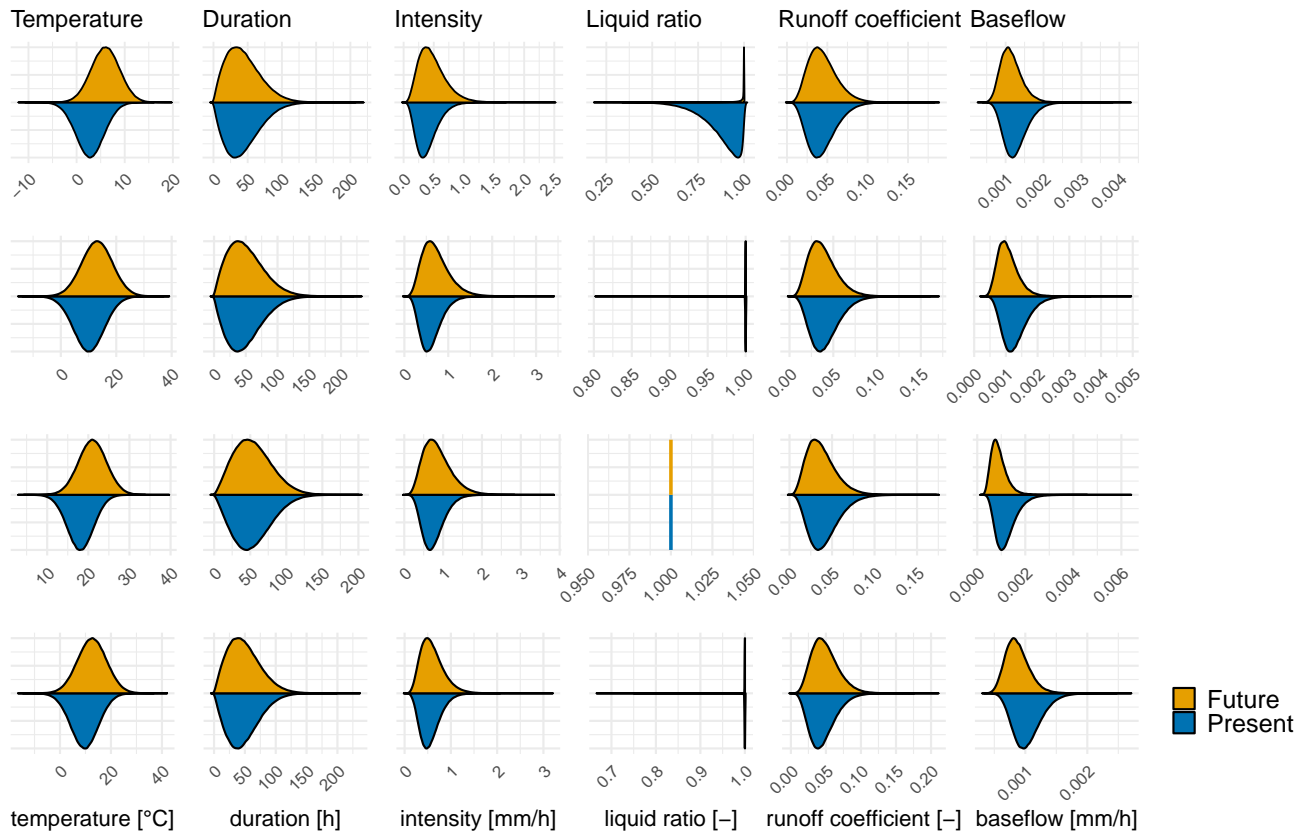

**Figure 7.** Probability density functions of the main hydrometeorological processes and their variation under climate change, shown for each season (rows: DJF, MAM, JJA, SON). Present period in blue, future period in orange.

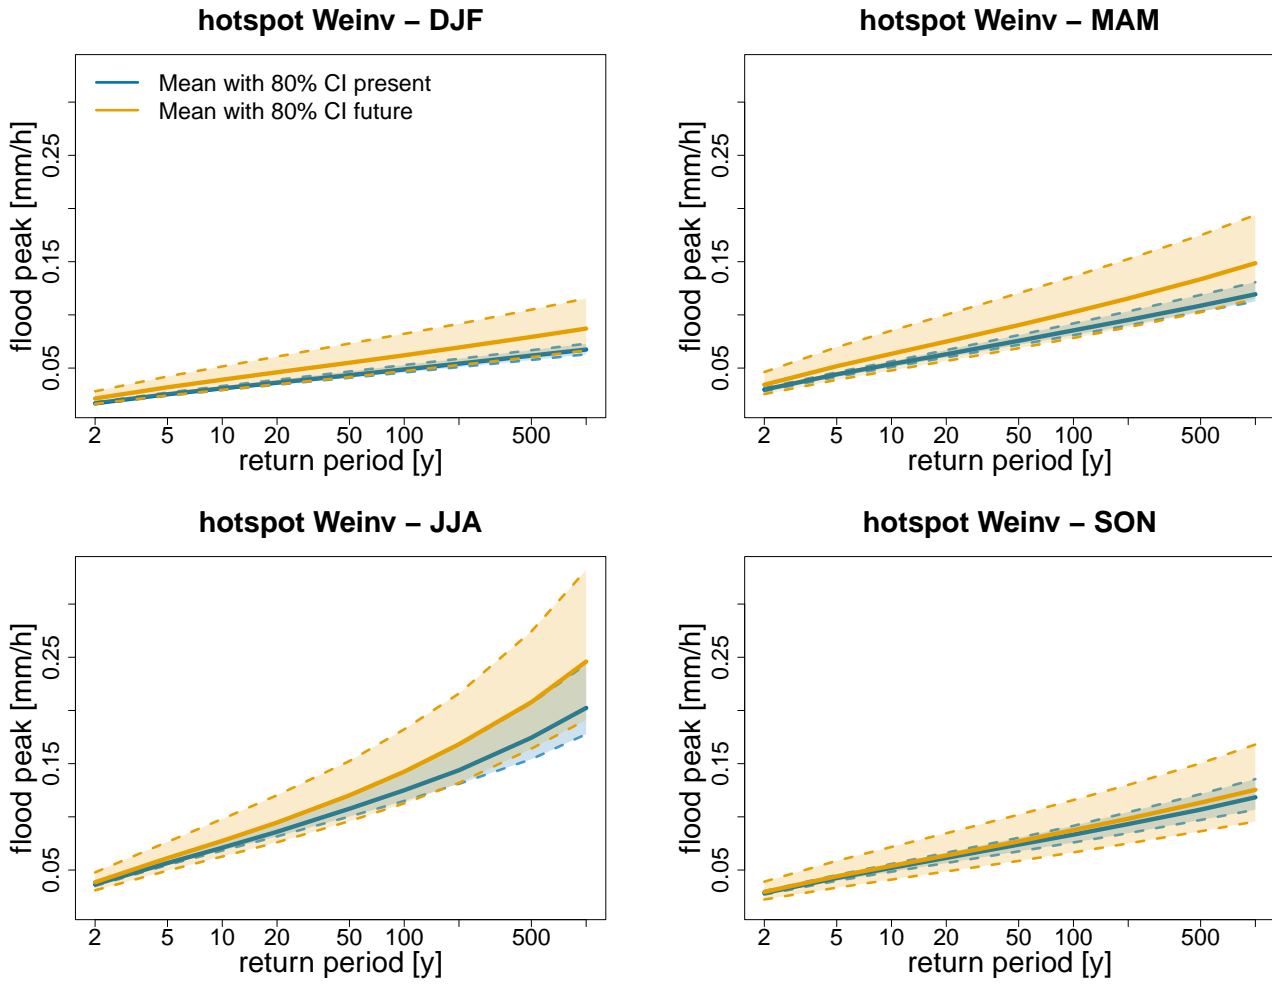

**Figure 8.** Seasonal flood frequency curves for the present (blue) and future (orange) periods with 80% confidence intervals.

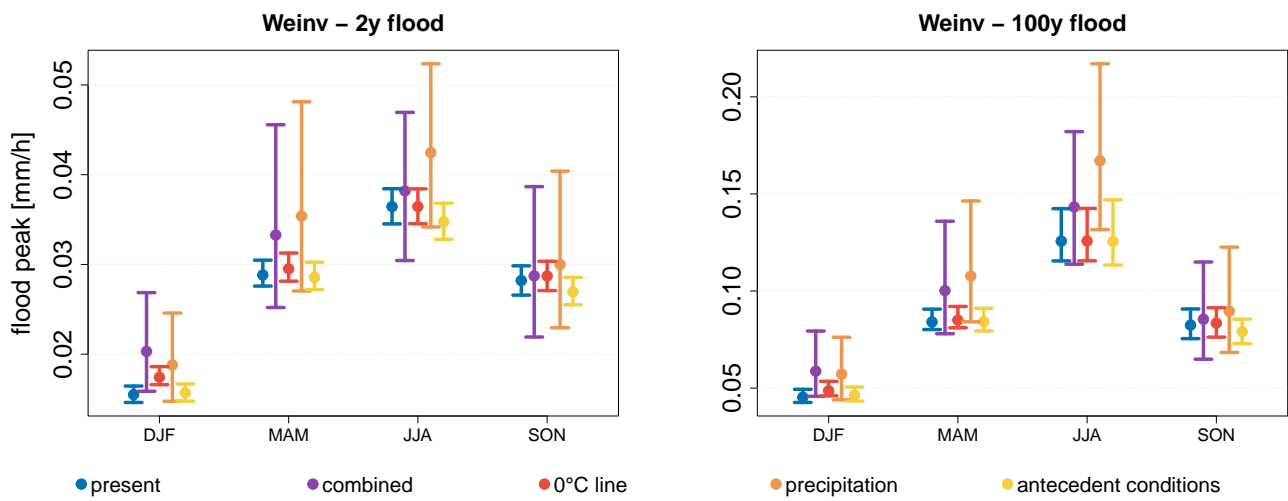

**Figure 9.** Projected variation of the 2-year (left) and 100-year (right) flood quantile with 80% confidence intervals. Scenarios isolate the contribution of distinct flood-generating mechanisms.

#### 4 Hotspot – [Innv]

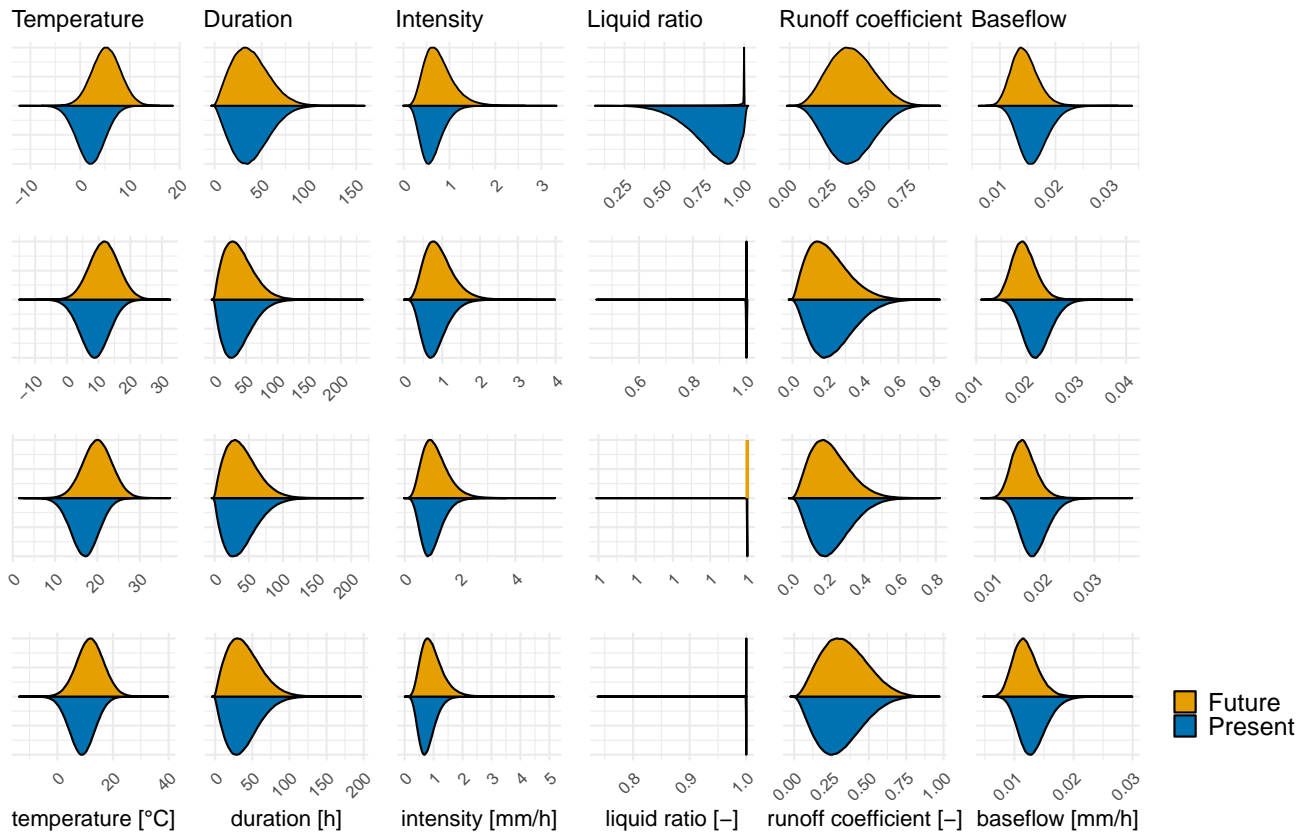

**Figure 10.** Probability density functions of the main hydrometeorological processes and their variation under climate change, shown for each season (rows: DJF, MAM, JJA, SON). Present period in blue, future period in orange.

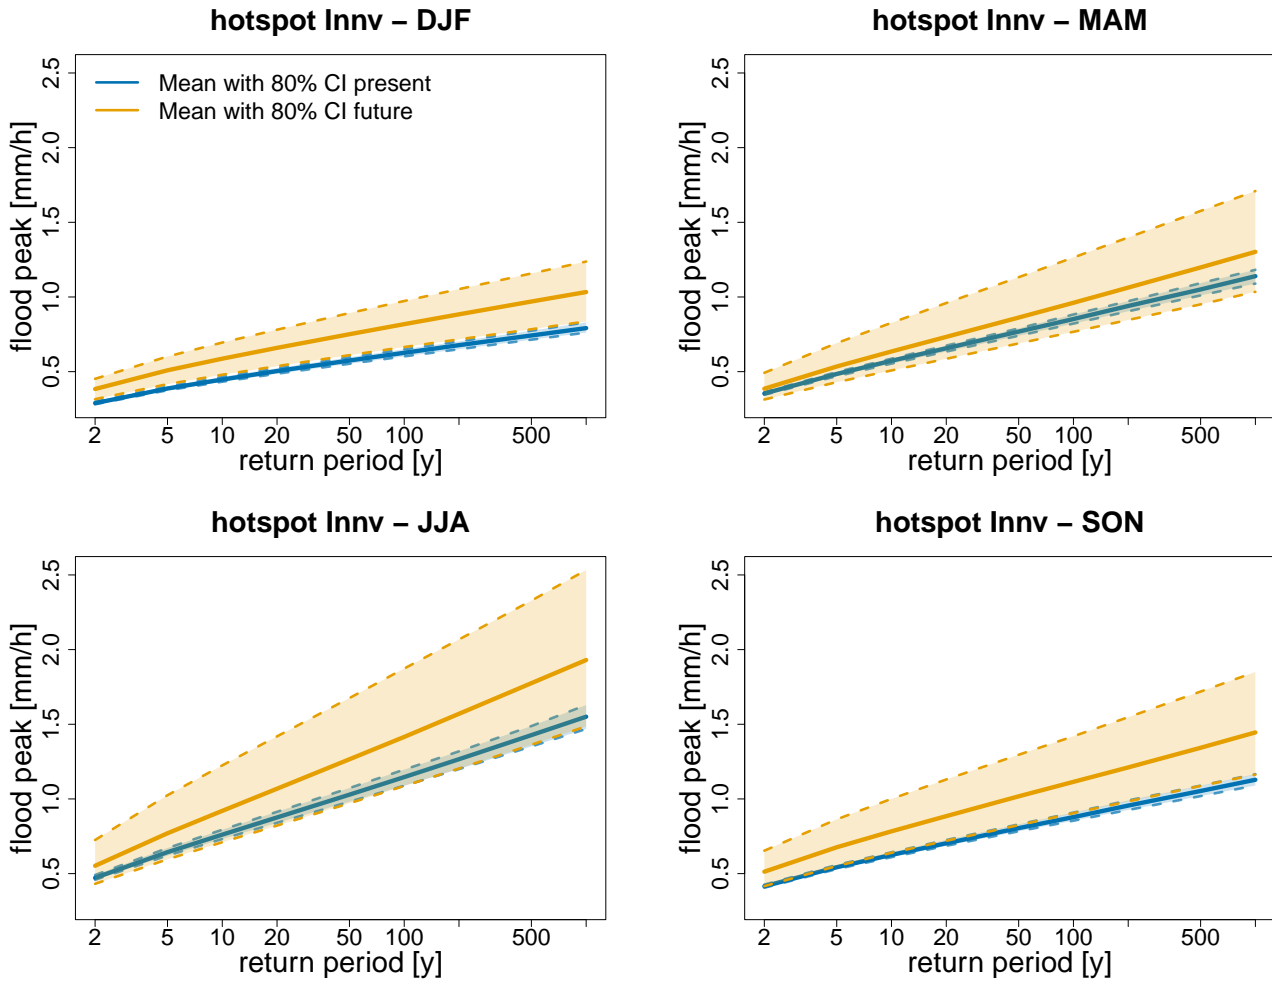

**Figure 11.** Seasonal flood frequency curves for the present (blue) and future (orange) periods with 80% confidence intervals.

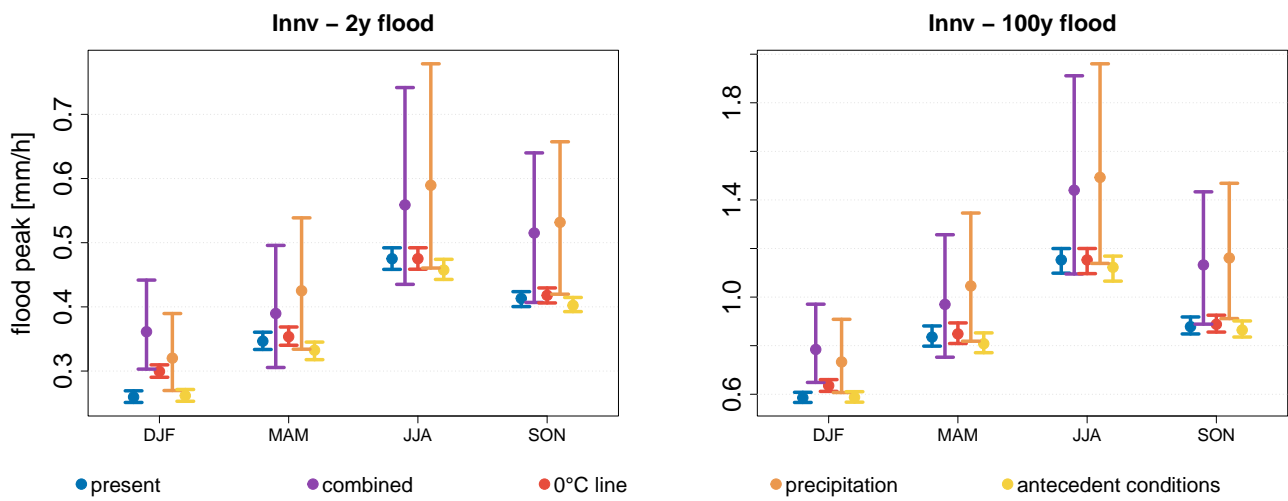

**Figure 12.** Projected variation of the 2-year (left) and 100-year (right) flood quantile with 80% confidence intervals. Scenarios isolate the contribution of distinct flood-generating mechanisms.

## 5 Hotspot – [Oztz]

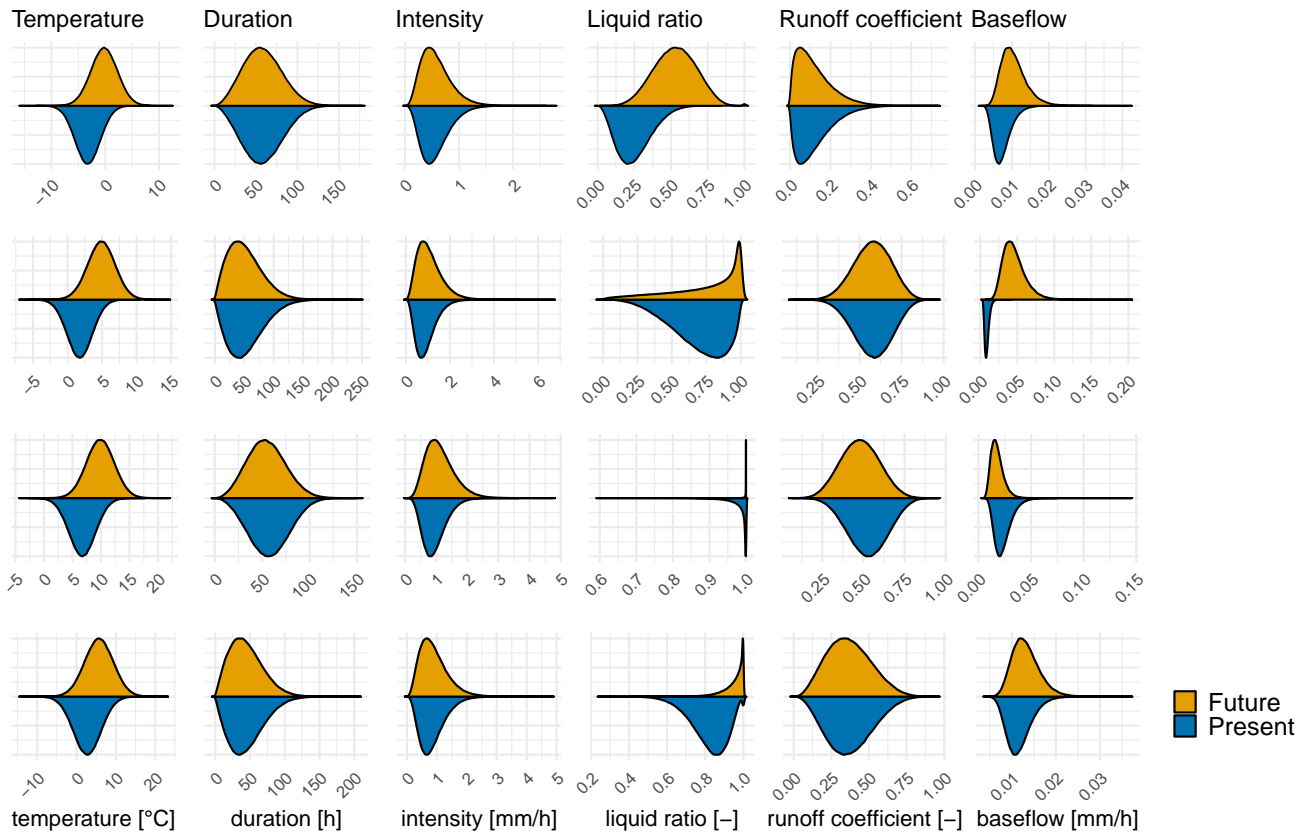

**Figure 13.** Probability density functions of the main hydrometeorological processes and their variation under climate change, shown for each season (rows: DJF, MAM, JJA, SON). Present period in blue, future period in orange.

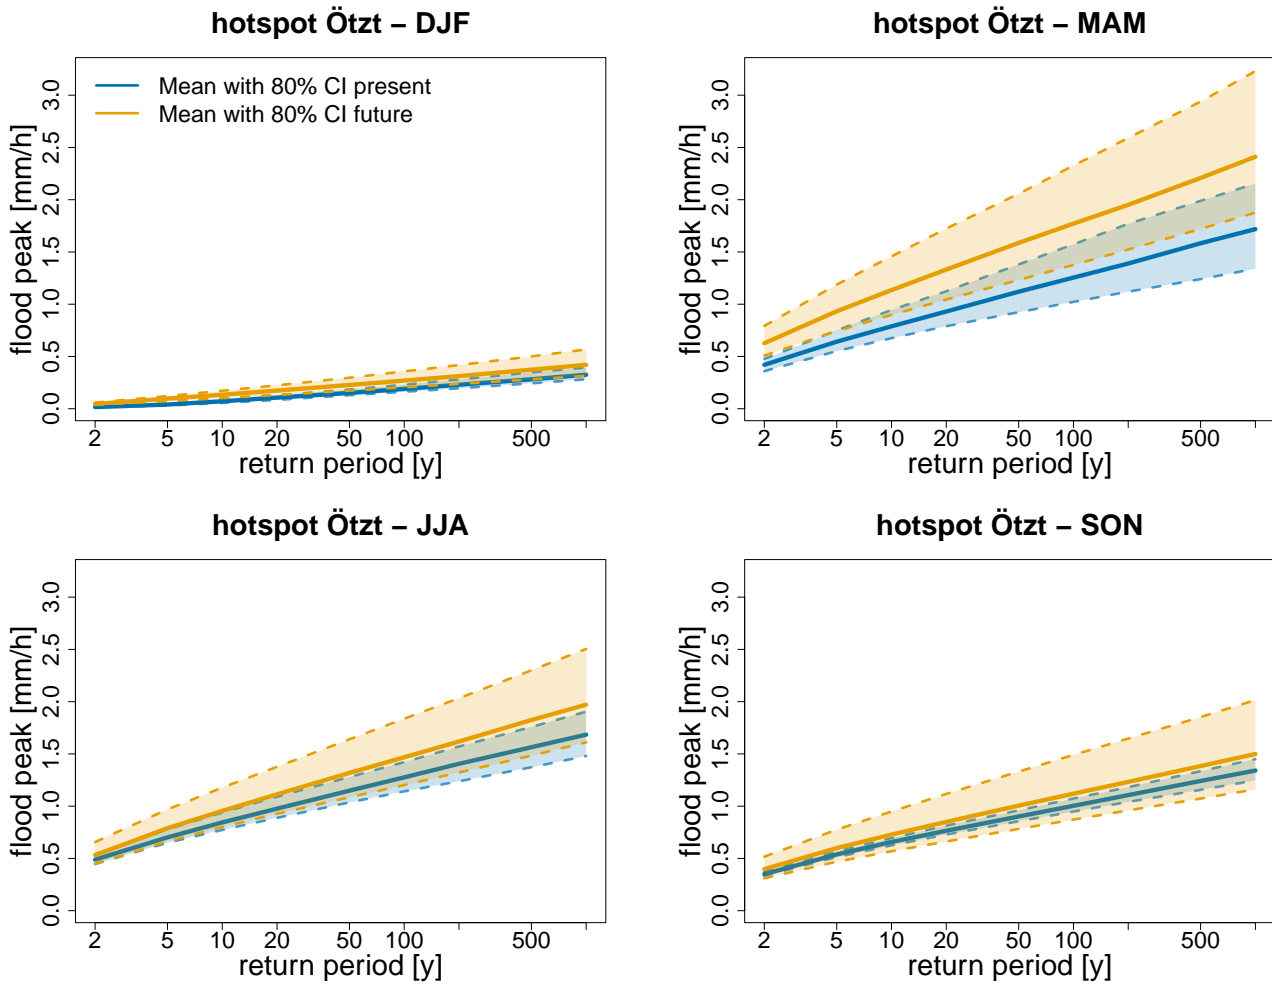

**Figure 14.** Seasonal flood frequency curves for the present (blue) and future (orange) periods with 80% confidence intervals.

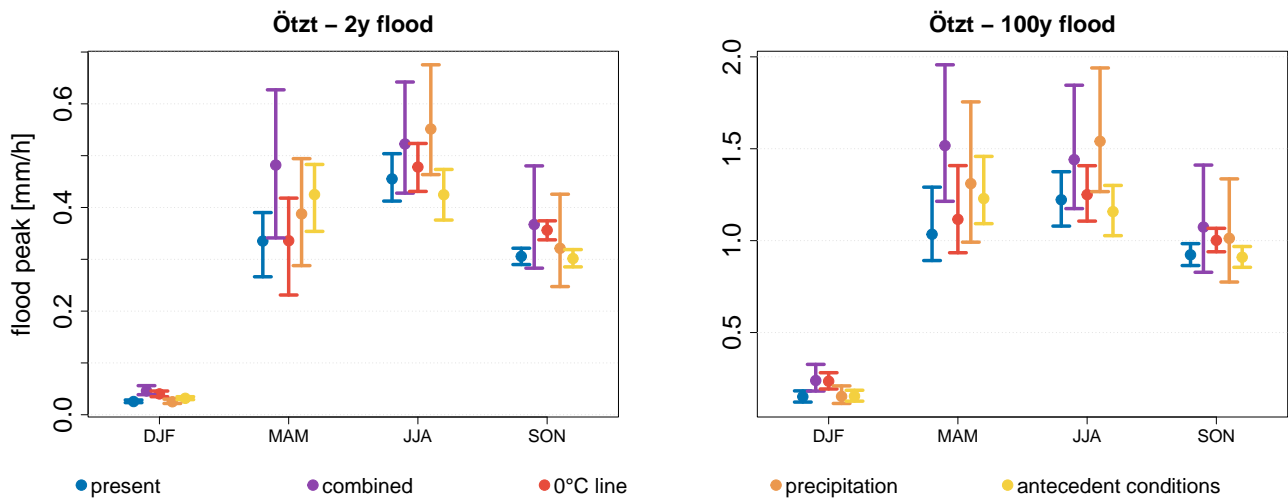

**Figure 15.** Projected variation of the 2-year (left) and 100-year (right) flood quantile with 80% confidence intervals. Scenarios isolate the contribution of distinct flood-generating mechanisms.

## 6 Hotspot – [Muhly]

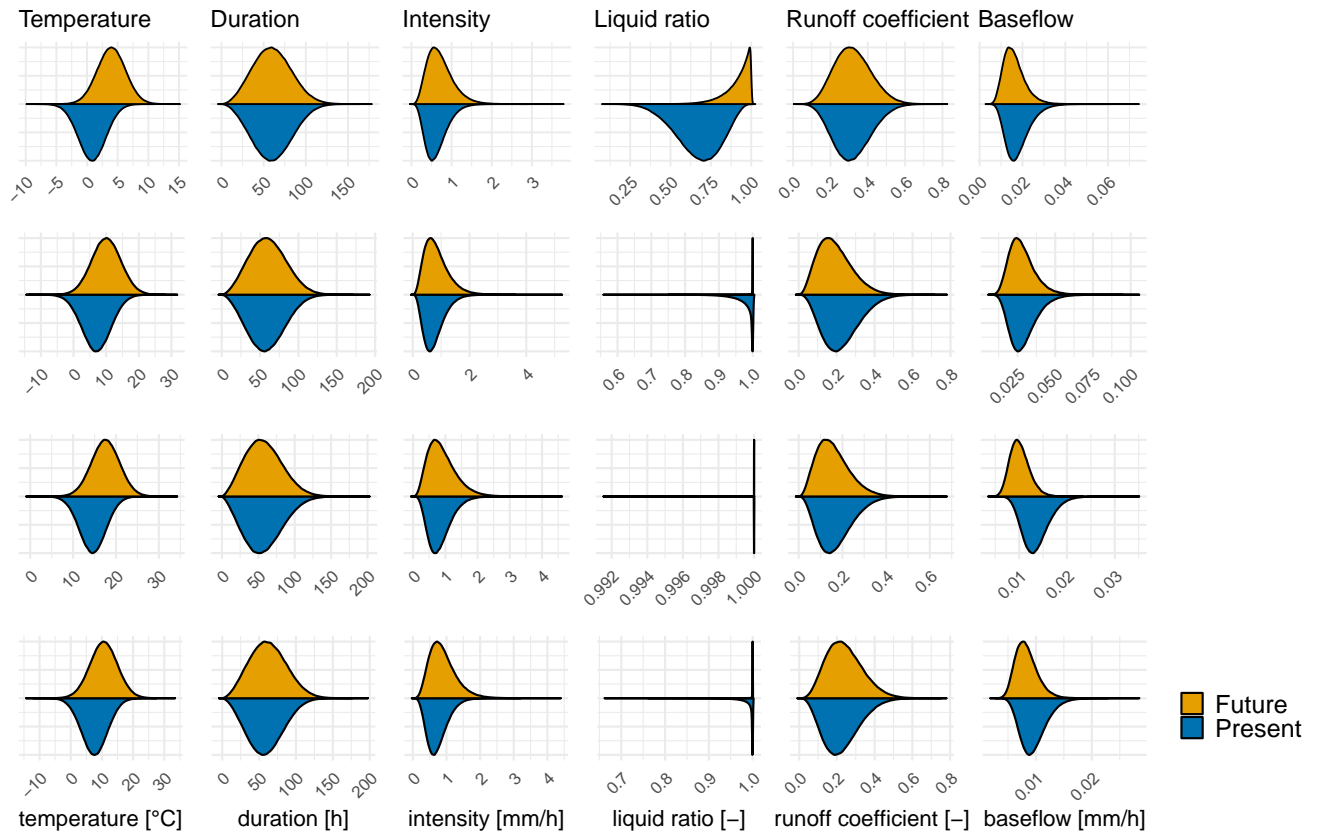

**Figure 16.** Probability density functions of the main hydrometeorological processes and their variation under climate change, shown for each season (rows: DJF, MAM, JJA, SON). Present period in blue, future period in orange.

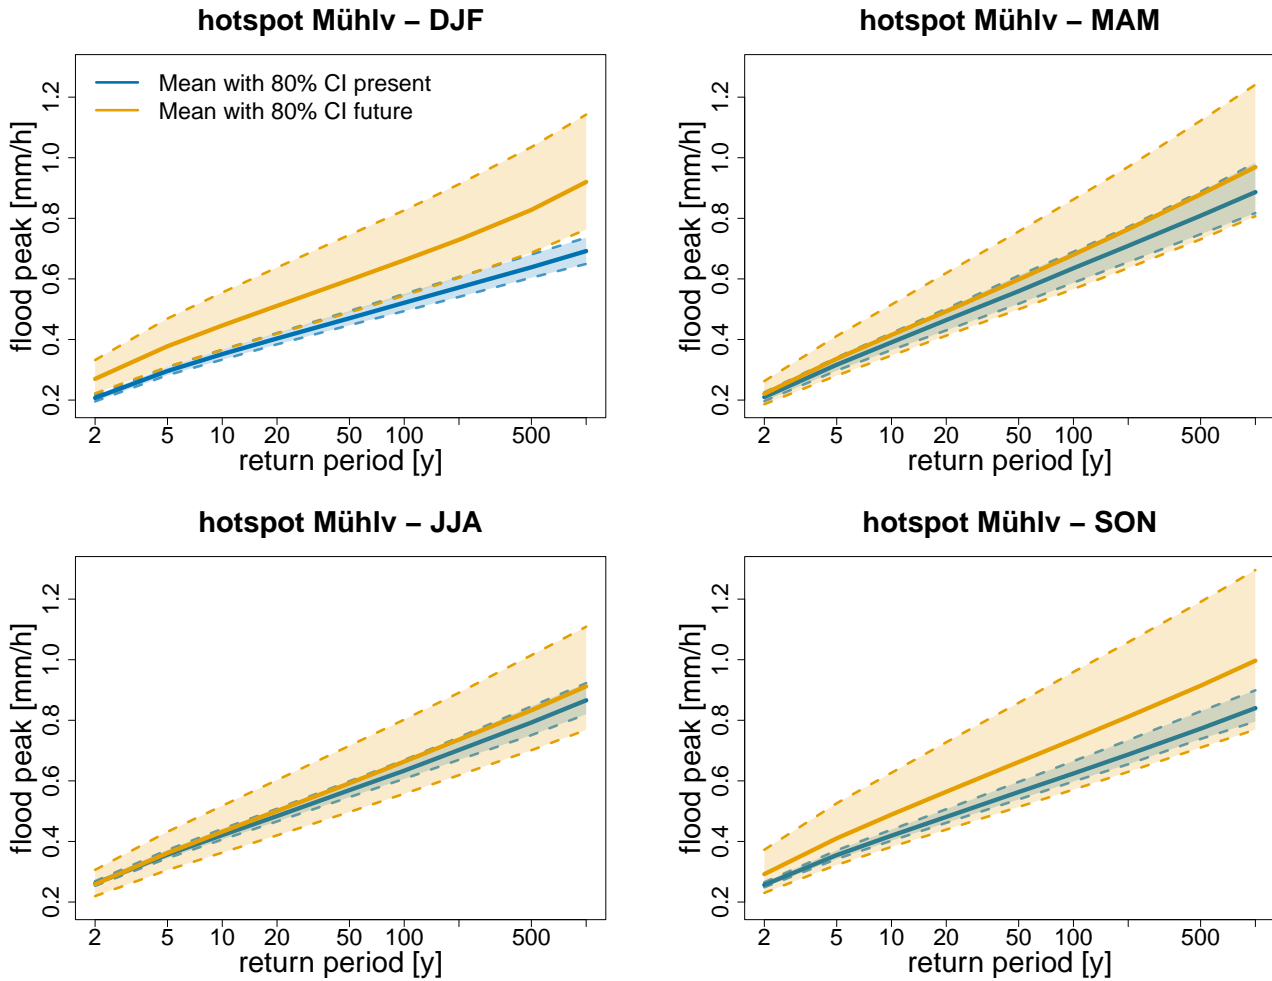

**Figure 17.** Seasonal flood frequency curves for the present (blue) and future (orange) periods with 80% confidence intervals.

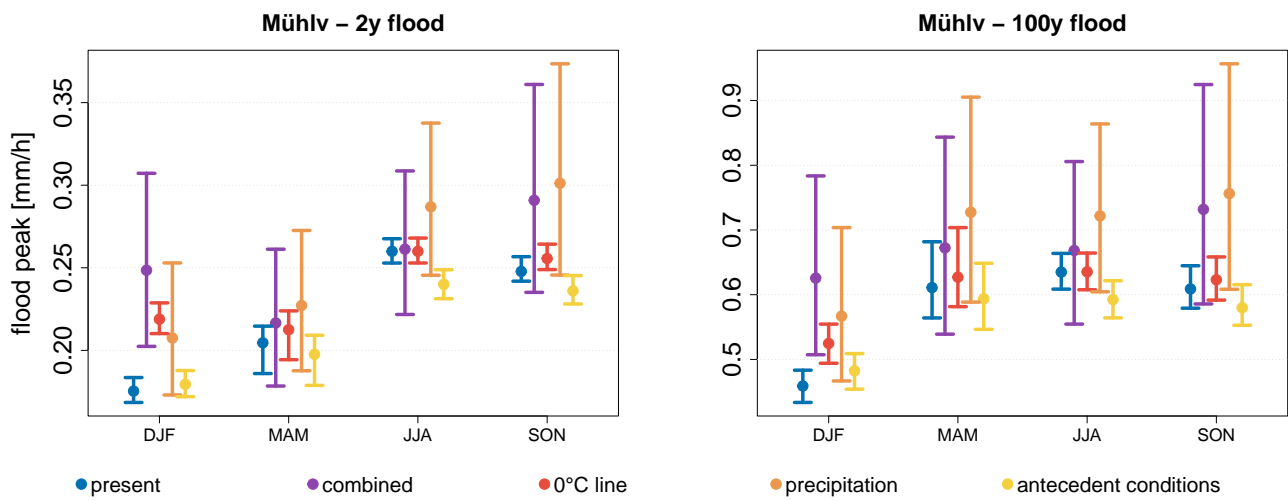

**Figure 18.** Projected variation of the 2-year (left) and 100-year (right) flood quantile with 80% confidence intervals. Scenarios isolate the contribution of distinct flood-generating mechanisms.

## 7 Hotspot – [Gail]

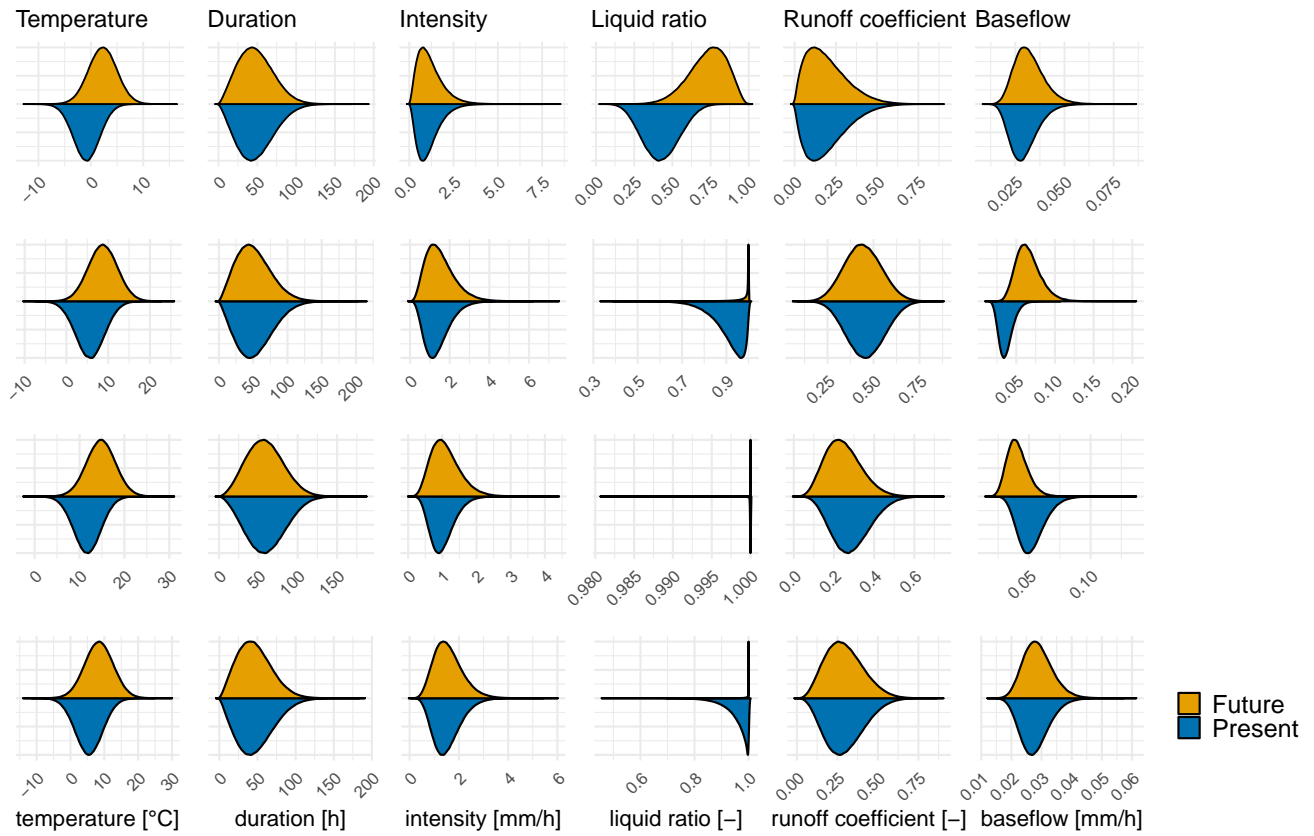

**Figure 19.** Probability density functions of the main hydrometeorological processes and their variation under climate change, shown for each season (rows: DJF, MAM, JJA, SON). Present period in blue, future period in orange.

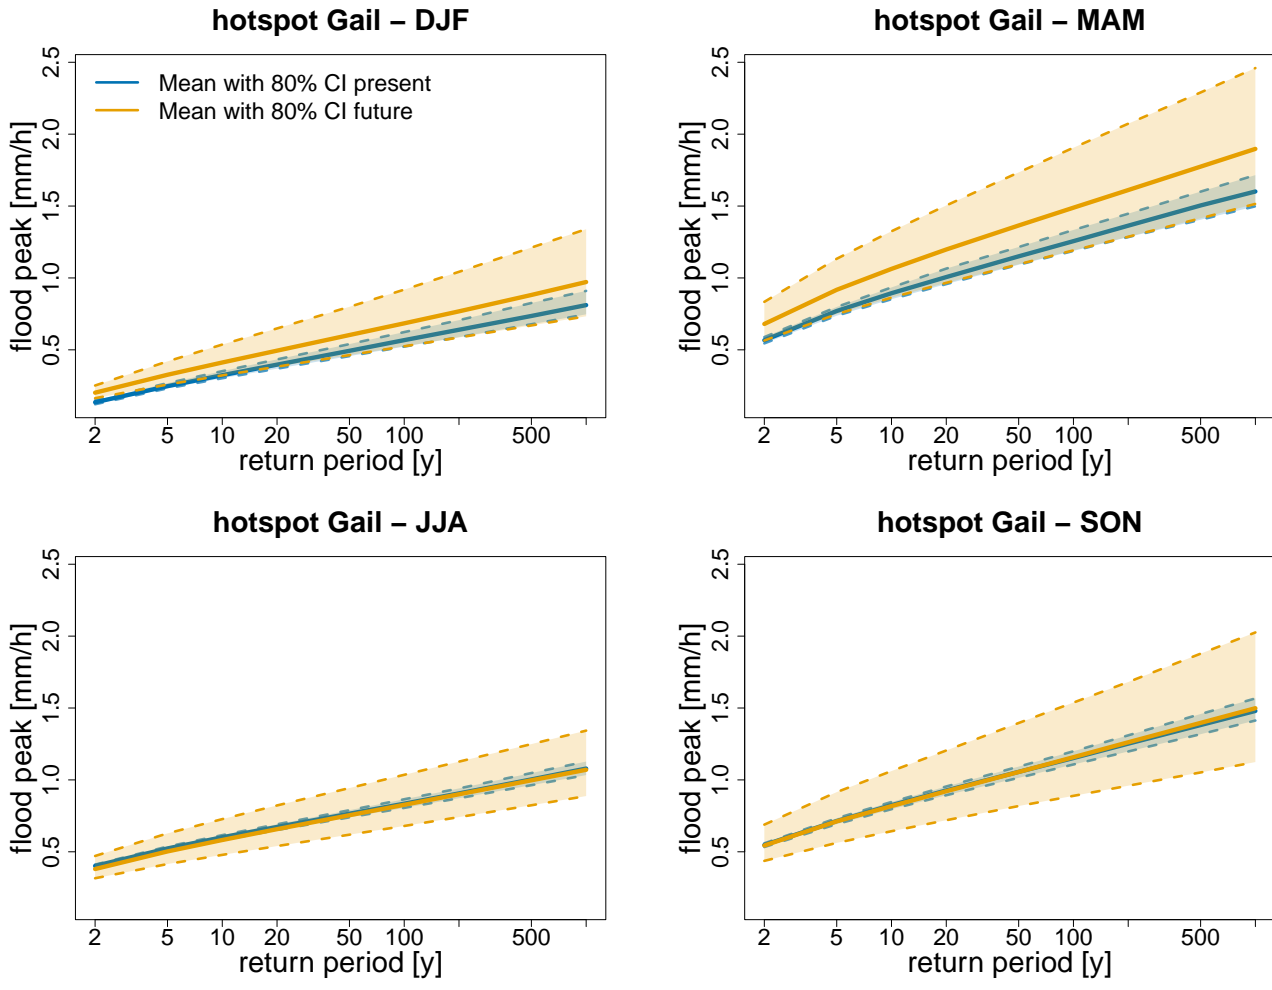

**Figure 20.** Seasonal flood frequency curves for the present (blue) and future (orange) periods with 80% confidence intervals.

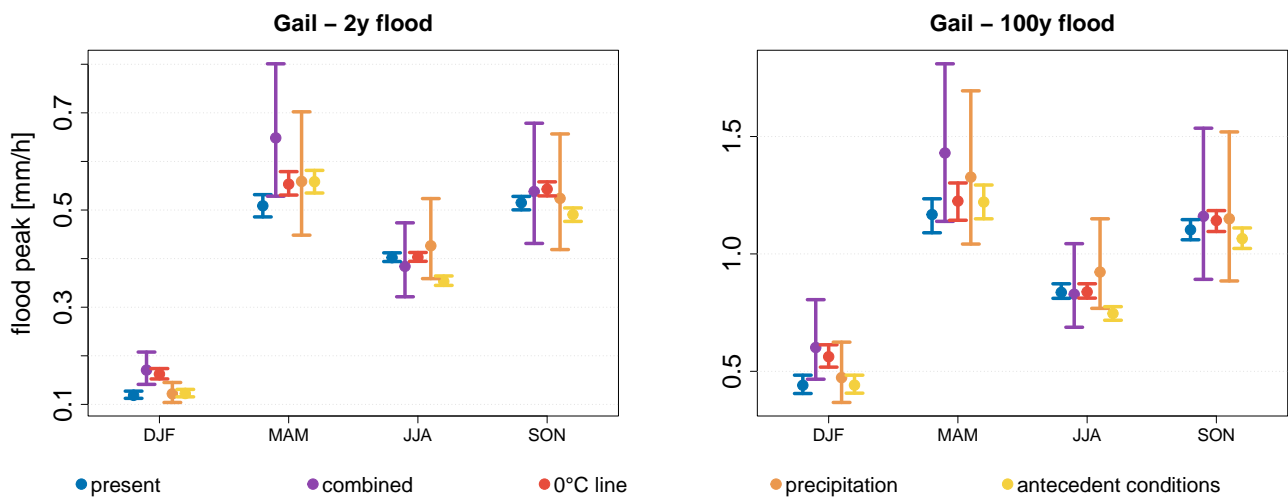

**Figure 21.** Projected variation of the 2-year (left) and 100-year (right) flood quantile with 80% confidence intervals. Scenarios isolate the contribution of distinct flood-generating mechanisms.

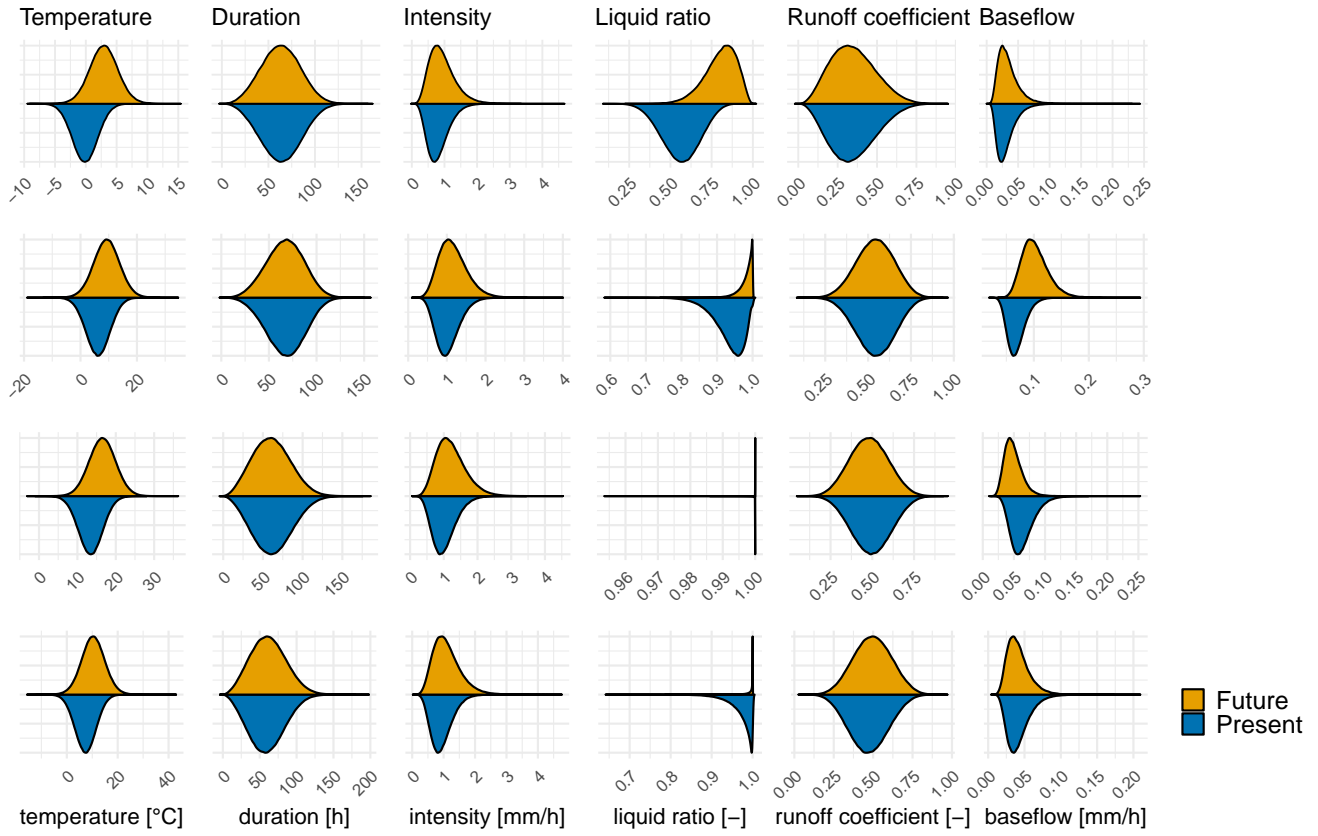

**Figure 22.** Probability density functions of the main hydrometeorological processes and their variation under climate change, shown for each season (rows: DJF, MAM, JJA, SON). Present period in blue, future period in orange.

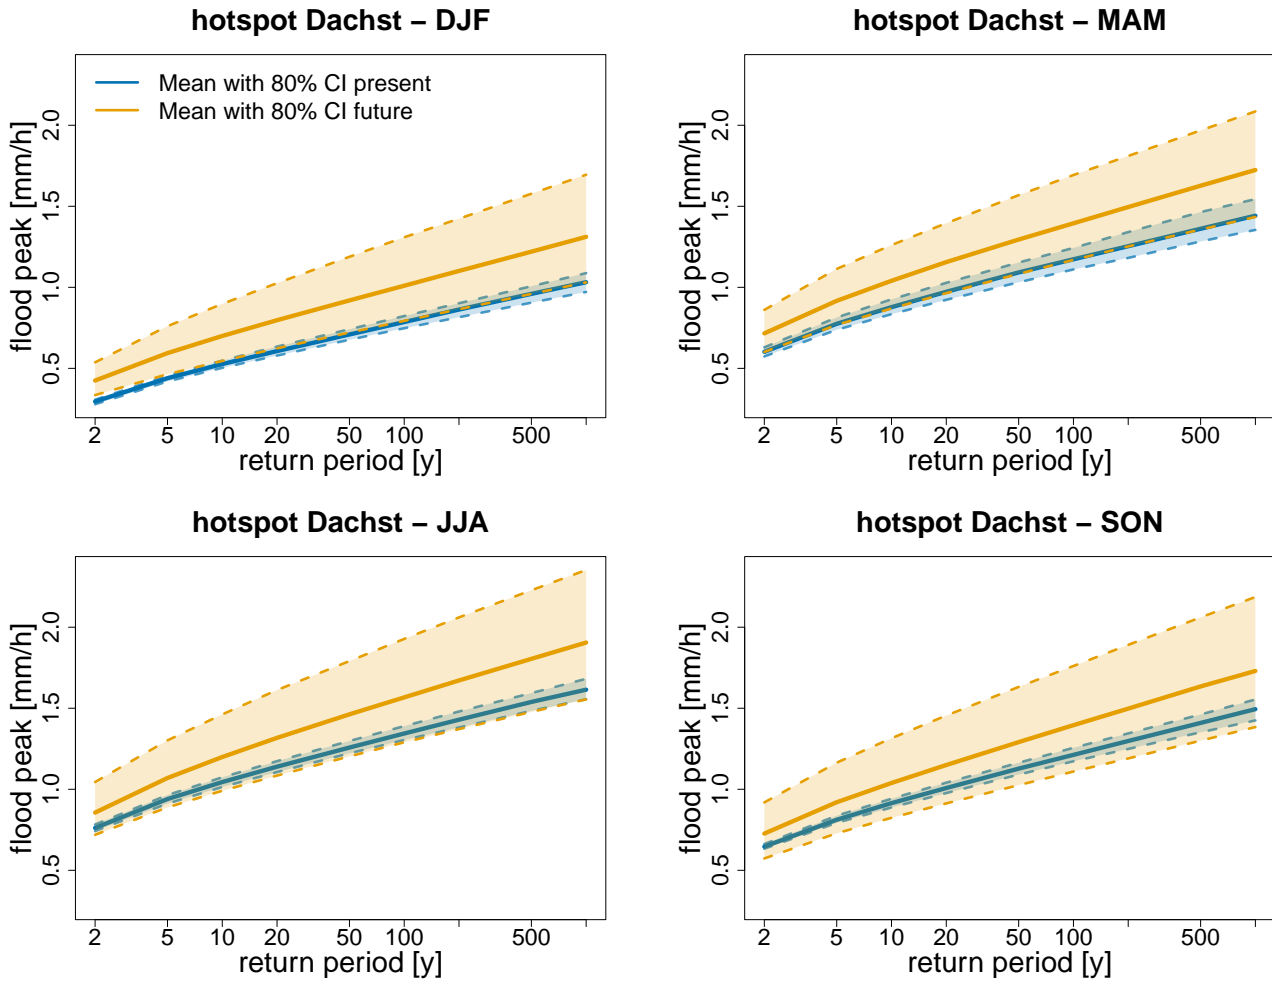

**Figure 23.** Seasonal flood frequency curves for the present (blue) and future (orange) periods with 80% confidence intervals.

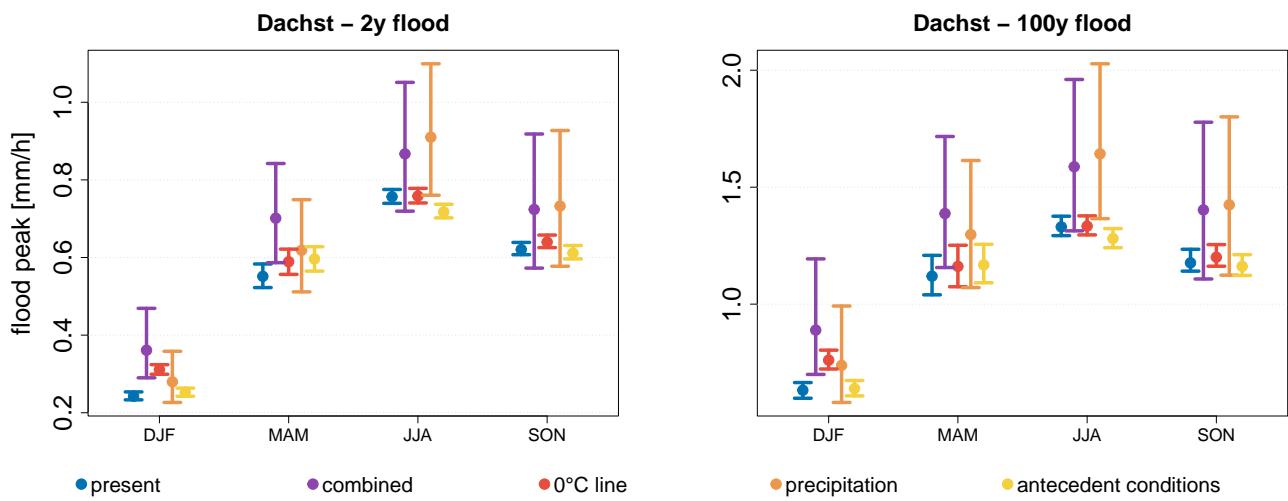

**Figure 24.** Projected variation of the 2-year (left) and 100-year (right) flood quantile with 80% confidence intervals. Scenarios isolate the contribution of distinct flood-generating mechanisms.

## 9 Hotspot – [Waldv]

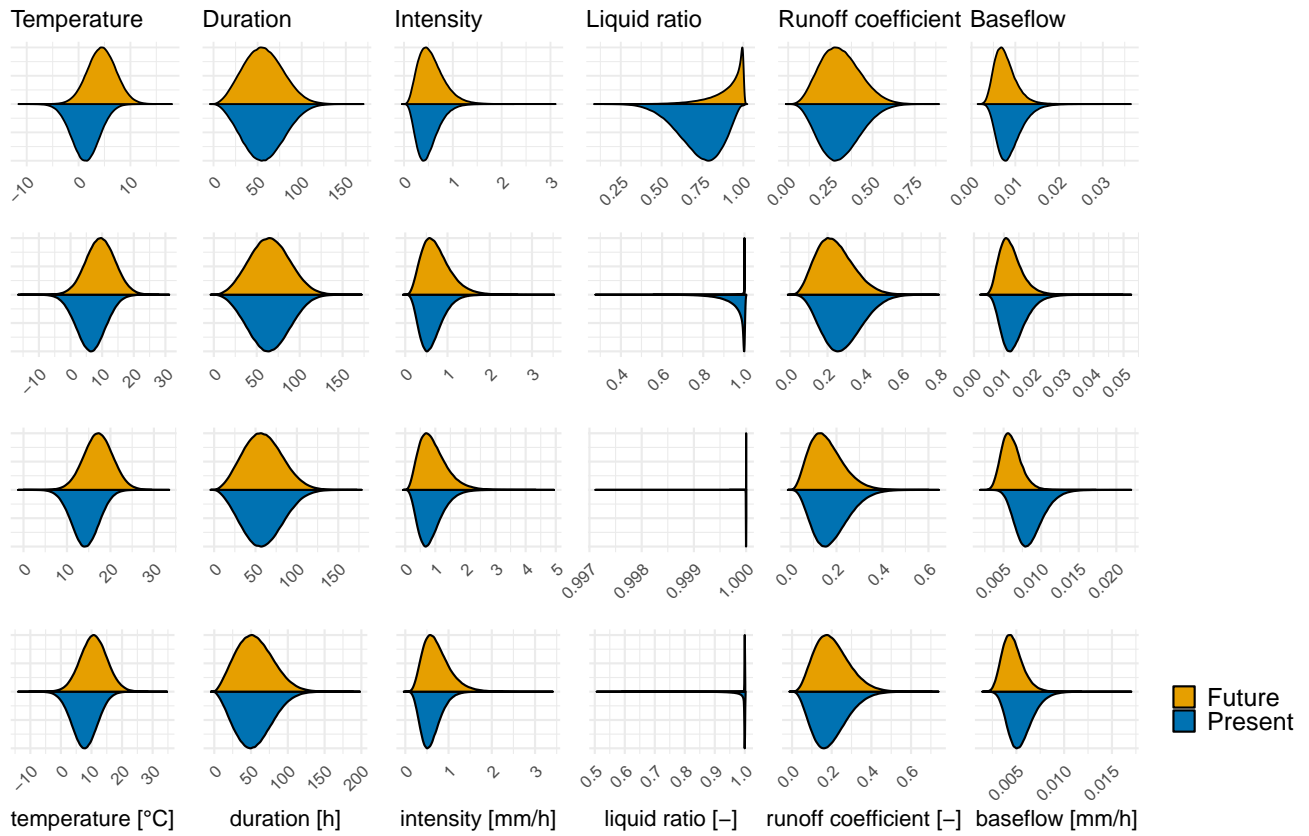

**Figure 25.** Probability density functions of the main hydrometeorological processes and their variation under climate change, shown for each season (rows: DJF, MAM, JJA, SON). Present period in blue, future period in orange.

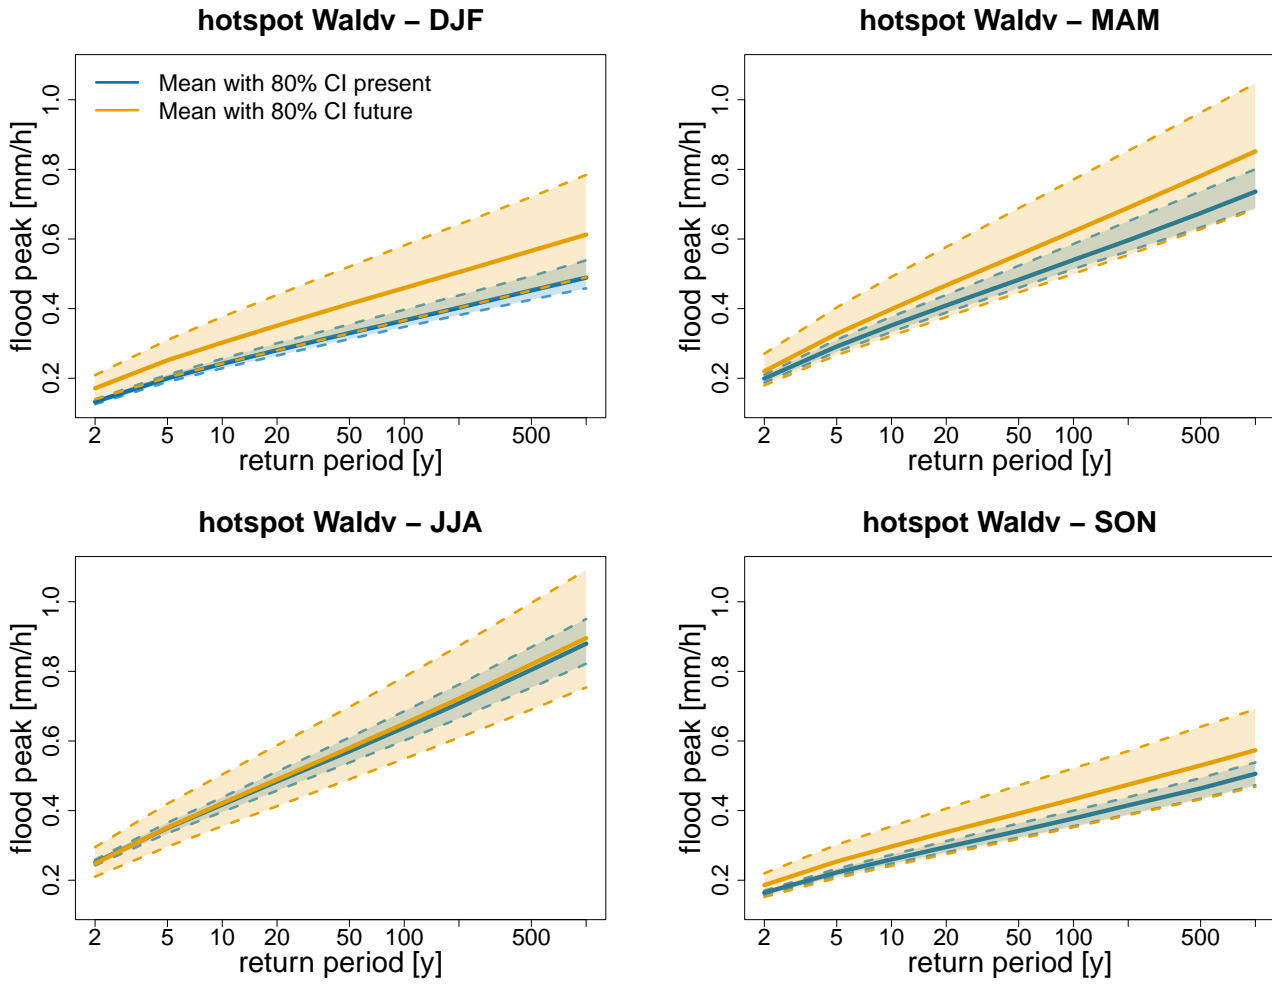

**Figure 26.** Seasonal flood frequency curves for the present (blue) and future (orange) periods with 80% confidence intervals.

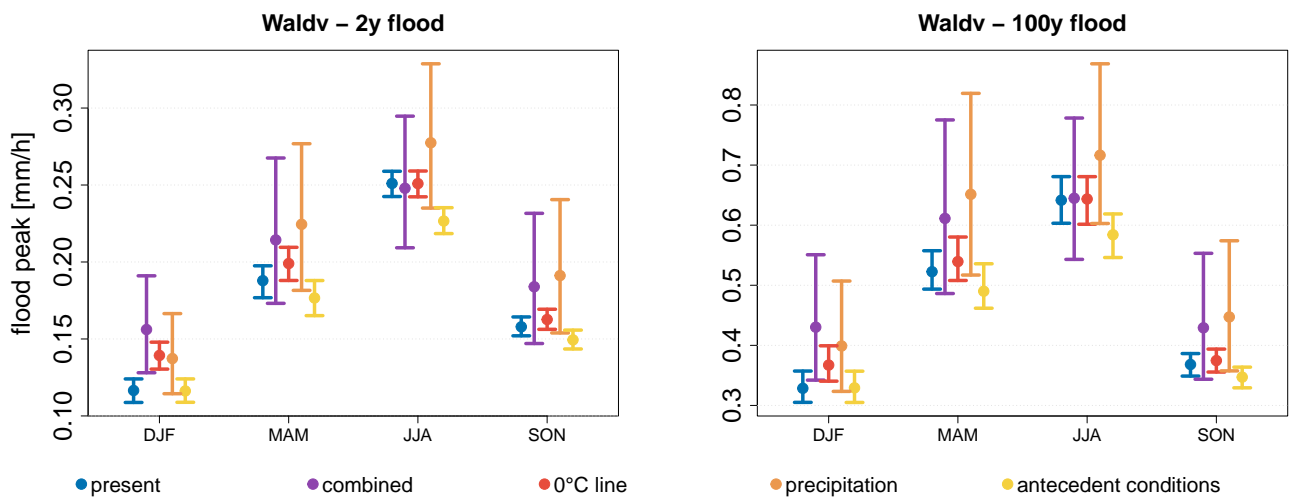

**Figure 27.** Projected variation of the 2-year (left) and 100-year (right) flood quantile with 80% confidence intervals. Scenarios isolate the contribution of distinct flood-generating mechanisms.

## 10 Hotspot – [Gurk]

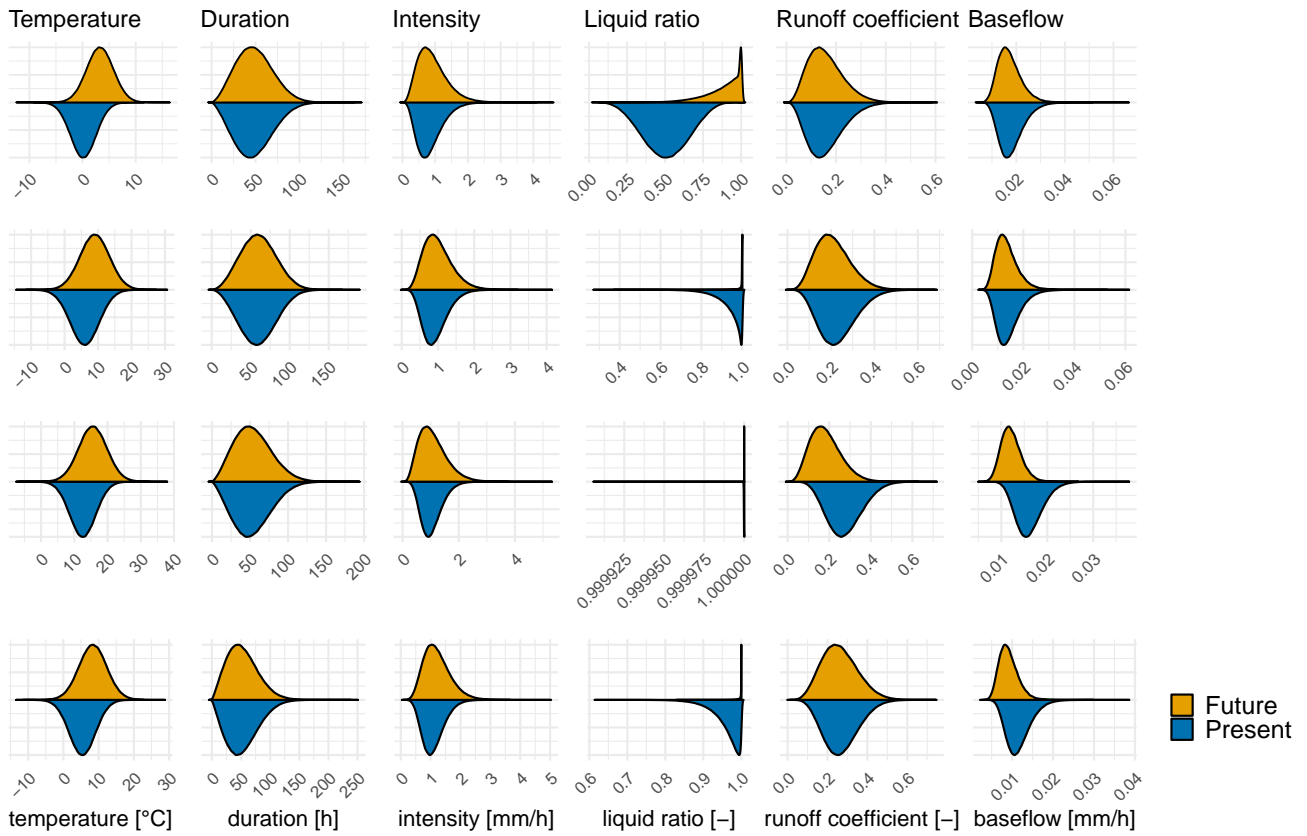

**Figure 28.** Probability density functions of the main hydrometeorological processes and their variation under climate change, shown for each season (rows: DJF, MAM, JJA, SON). Present period in blue, future period in orange.

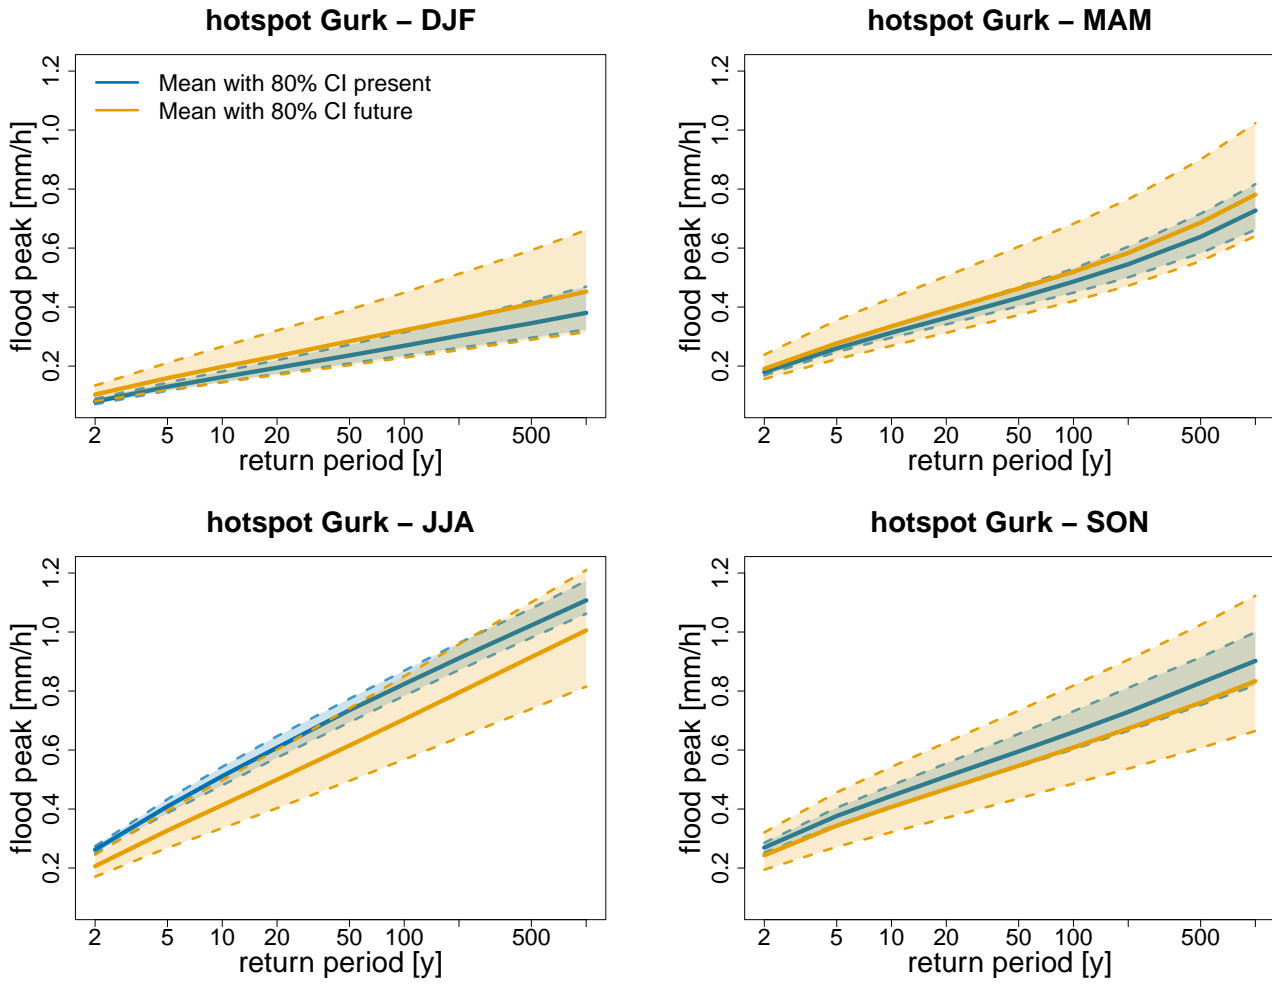

**Figure 29.** Seasonal flood frequency curves for the present (blue) and future (orange) periods with 80% confidence intervals.

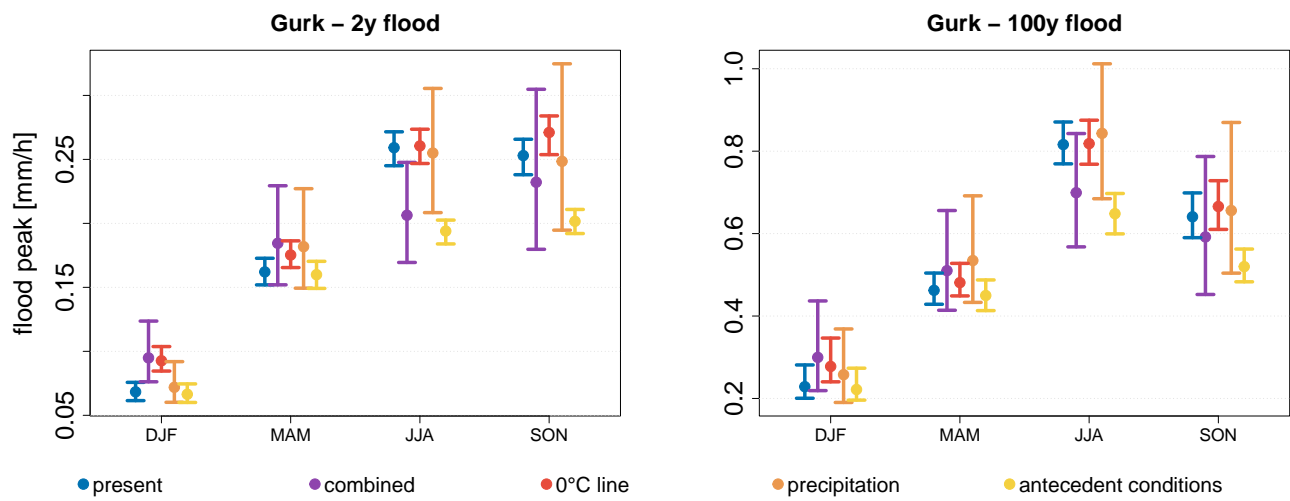

**Figure 30.** Projected variation of the 2-year (left) and 100-year (right) flood quantile with 80% confidence intervals. Scenarios isolate the contribution of distinct flood-generating mechanisms.
